# Supplementary material for: A metal organic framework-derived octahedral Cu1.95S@CoS2 for secondary batteries displaying long cycle life and stable temperature tolerance
Source: Royal Society of Chemistry journal article supplement (doi:10.1039/d3cc05111k), 2023-01-01
Supplement: d3cc05111k1.pdf [file d3cc05111k1.pdf]

Electronic Supplementary Information (ESI) for Chemical Communications. This journal is (c) The Royal Society of Chemistry 2023.

Electronic Supplementary Information (ESI)

**A metal organic framework-derived octahedral Cu<sub>1.95</sub>S@CoS<sub>2</sub> for secondary batteries displaying long cycle life and stable temperature tolerance**

Tianli Han<sup>a,\*</sup>, Haiyuan Bai<sup>a</sup>, Jing Xu<sup>a</sup>, Yajun Zhu<sup>a,b</sup>, Xirong Lin<sup>c</sup>, Jinyun Liu<sup>a,\*</sup>

### Experimental details

**Preparation of Cu-MOF:** 1.1545 g Cu(NO<sub>3</sub>)<sub>3</sub>·3H<sub>2</sub>O was dissolved in 15 mL of DMF to form a solution A, and 0.6145 g H<sub>3</sub>BTC was dissolved in 15 mL of DMF to form a solution B. Then, 0.4389 g PVP was added to solution A and stirred for 10 min to form a mixed solution. After that, solution B was slowly added to solution A and stirred for 1 h. The mixture was poured into a teflon-liner and reacted in an autoclave at 80 °C for 24 h. The precipitate was washed by DMF and ethanol, and dried at 70 °C for 12 h.

**Preparation of Cu-MOF@Co-MOF:** In this experiment, 0.2 g Cu-MOF was dispersed in 50 mL of methanol by ultrasound for 10 min. Then, 0.821 g dimethylimidazole was dissolved into 50 mL of methanol and added into the above solution. At the same time, 0.582 g Co(NO<sub>3</sub>)<sub>2</sub>·6H<sub>2</sub>O was added into the above solution and stirred for one h. After the stirring, the mixed solution was kept at room temperature for 6 h, then the precipitate was collected and washed by ethanol, and dried at 70 °C for 12 h.

**Preparation of Cu<sub>1.95</sub>S@CoS<sub>2</sub> composite:** 3 g sulfur powder and 0.15 g Cu-MOF@Co-MOF were placed on both sides of the porcelain boat, and the porcelain boat was placed in a tubular furnace. Among them, the sulfur powder is located in the

upstream of the vent. In the atmosphere of Ar, the tubular furnace was heated to 500 °C at the rate of 2 °C/min and maintained for 1 h. At last, the sample was collected for further use.

**Characterizations:** The crystal structure and phase analysis were measured by XRD diffractometer (XRD SMART APEX II Brook, Cu K $\alpha$  X-ray wavelength=1.5418 Å). Scanning electron microscope (SEM, Hitachi 8100, 5 KV) and transmission electron microscope (TEM, Hitachi HT-7700, 120 KV) were used to observe the microstructure of sample. The lattice fringes of the sample were observed by high resolution transmission electron microscopy (HRTEM, TecnaiG220S-Twin, 200 KV). Energy-dispersive X-ray spectroscopy (EDX, Hitachi 8100, 15 KV) was applied to analyzed element mapping and composition. The binding energy of the sample and valence distribution of the element were investigated by X-ray photoelectron spectroscopy (XPS, EscalAB250, Al K $\alpha$   $h\nu$ =1486.6 eV). Adsorption-desorption curves and Brunauer-Emmett-Teller (BET) specific surface area of the sample were measured by ASAP Micromeritics Tristar 2460 instrument.

**Electrochemical tests:** Cu<sub>1.95</sub>S@CoS<sub>2</sub> (70 wt%) and conductive carbon black (20 wt%) were thoroughly mixed and ground for 30 min, then the polyvinylidene fluoride (PVDF, 6.54%, 10 wt%) was added as a binder. Subsequently, a few drops of N-methylpyrrolidone (NMP, 99.99%) was added as a dispersant to make it into a slurry. After stirring for 8 h, the paste is evenly coated on the carbon paper with a thickness of about 200  $\mu$ m. The carbon paper loaded with stock was dried in a vacuum oven for 24 h and then cut into electrode pieces of 1.13 cm<sup>2</sup>. The anode was pure aluminum sheet, the diaphragm was glass fiber, and the electrolyte composition was AlCl<sub>3</sub>:[EMIm]Cl=1.3:1. Before assembling the battery, a molybdenum sheet with a thickness of 0.02 mm and a diameter of 20 mm is added to the cathode shell to prevent the corrosion of the battery shell by the electrolyte. The battery was assembled in a glove box (MIKROUNA, Super1220/750/900) filled with Ar, which both water and oxygen value were less than 0.01 ppm. In the voltage range of 0.01-1.9 V, the cyclic

and rate performance of the battery are measured by galvanostatic method. The *ex-situ* XRD was investigated by XRD diffractometer (XRD SMART APEX II Brook, Cu K $\alpha$  X-ray wavelength=1.5418 Å). Cyclic voltammetry (CV) curves and Electrochemical impedance spectroscopy (EIS) were measured by electrochemical workstation (CHI660e). *In-situ* interface impedance was investigated by galvanostatic intermittent titration technique (GITT).

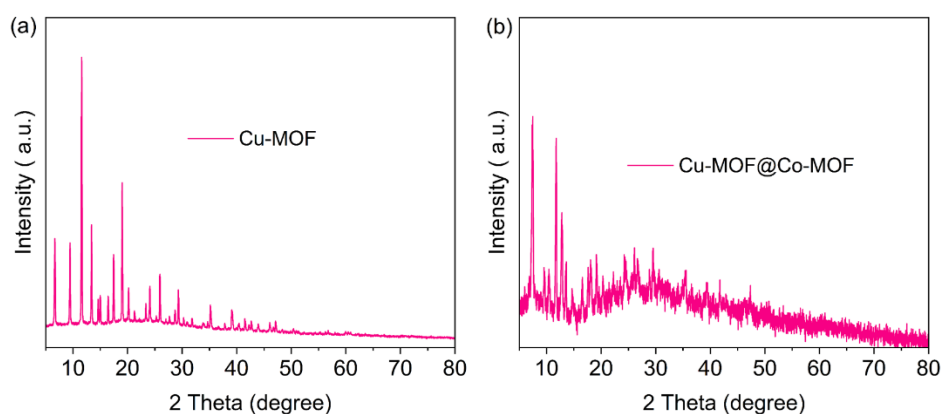

**Fig. S1** XRD patterns of (a) Cu-MOF and (b) Cu-MOFs@Co-MOF.

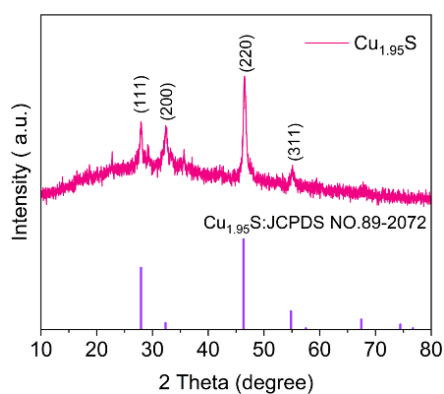

**Fig. S2** XRD patterns of Cu<sub>1.95</sub>S.

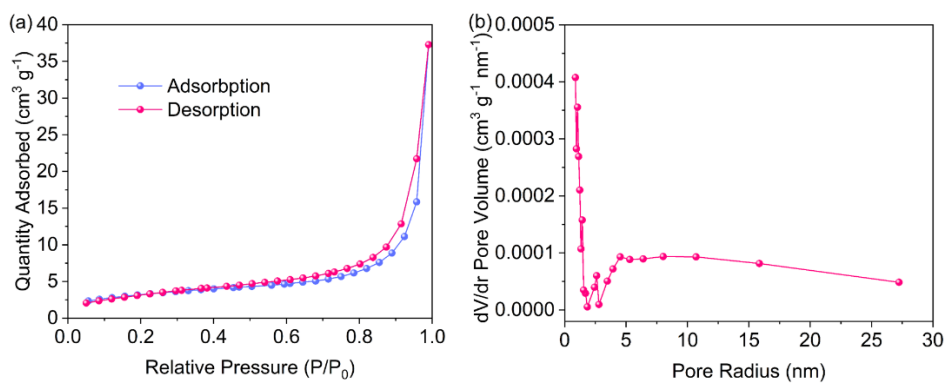

**Fig. S3** (a)  $N_2$  adsorption-desorption isotherms and (b) pore-size distribution of  $Cu_{1.95}S$ .

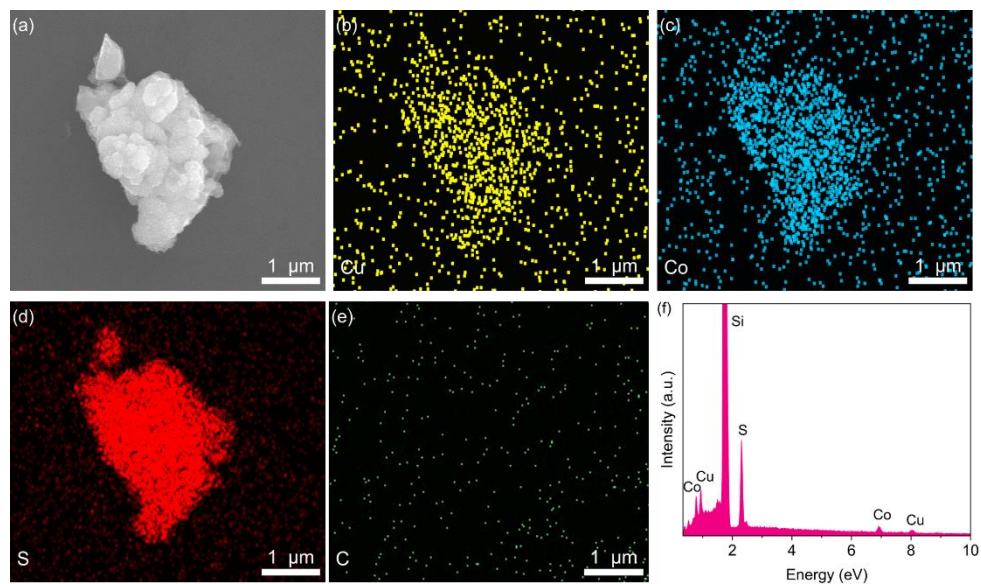

**Fig. S4** (a) SEM image and (b-e) elemental mappings of  $Cu_{1.95}S@CoS_2$ . (f) EDS spectrum of  $Cu_{1.95}S@CoS_2$ .

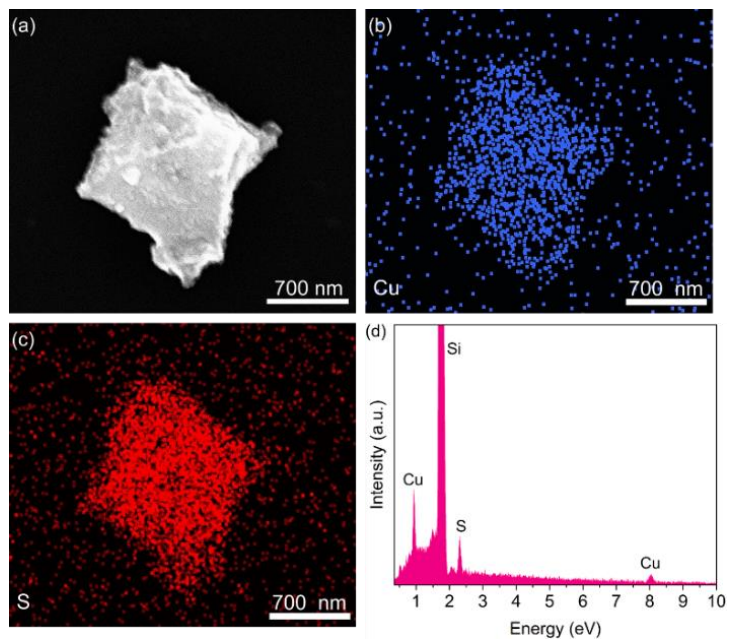

**Fig. S5** (a) SEM image of  $\text{Cu}_{1.95}\text{S}$ . (b,c) The corresponding elemental mappings. (d) EDS spectrum of  $\text{Cu}_{1.95}\text{S}$ .

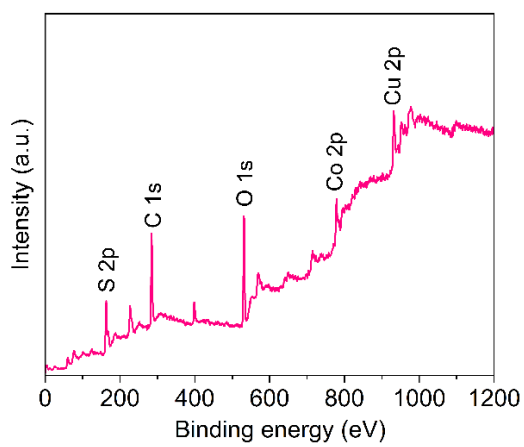

**Fig. S6** XPS full spectrum of  $\text{Cu}_{1.95}\text{S}@CoS_2$ .

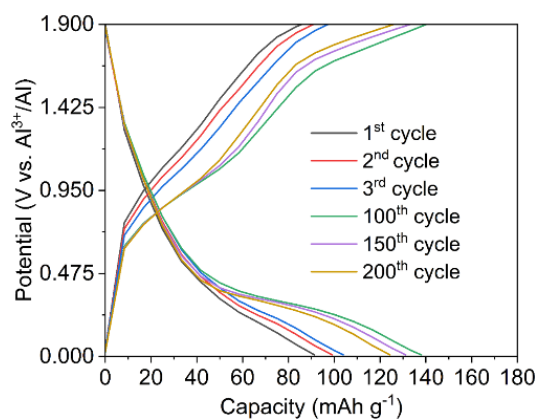

**Fig. S7** Charge-discharge curves of  $\text{Cu}_{1.95}\text{S}@/\text{CoS}_2$  cathode at  $-10\text{ }^\circ\text{C}$ .

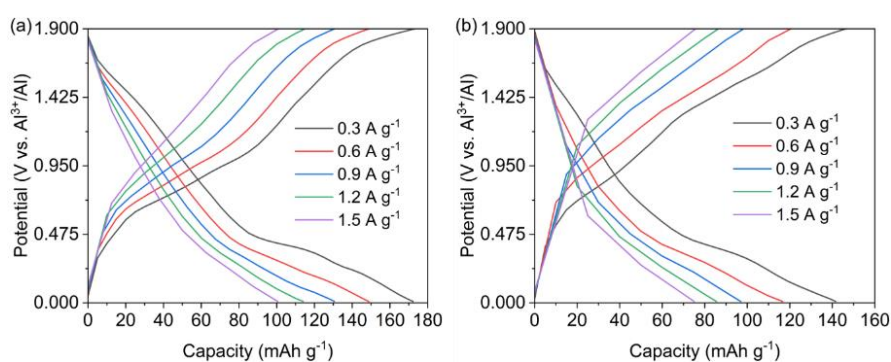

**Fig. S8** Charge-discharge curves of (a)  $\text{Cu}_{1.95}\text{S}@/\text{CoS}_2$  and (b)  $\text{Cu}_{1.95}\text{S}$  cathode at various current densities.

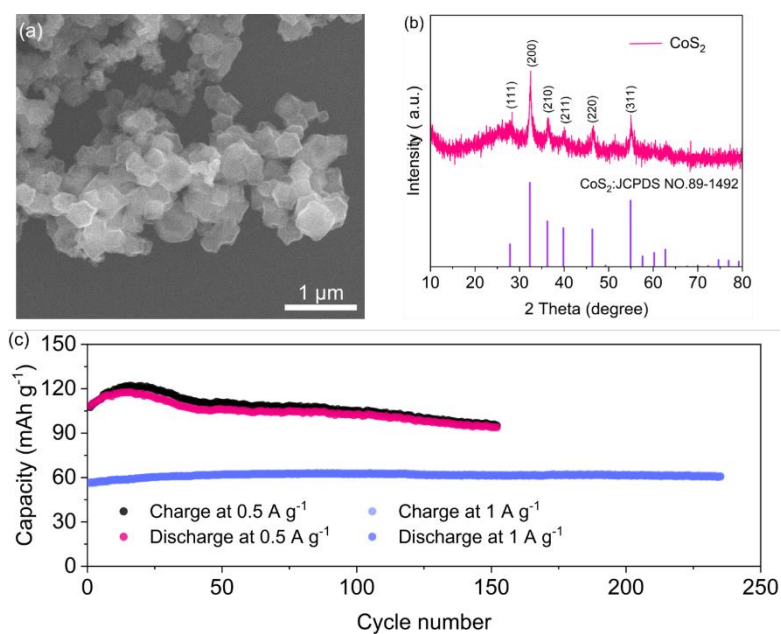

**Fig. S9** (a) SEM image of  $\text{CoS}_2$ . (b) XRD patterns of  $\text{CoS}_2$ . (c) Cycling performance of  $\text{CoS}_2$  cathode at  $0.5\text{ A g}^{-1}$  and  $1\text{ A g}^{-1}$ .

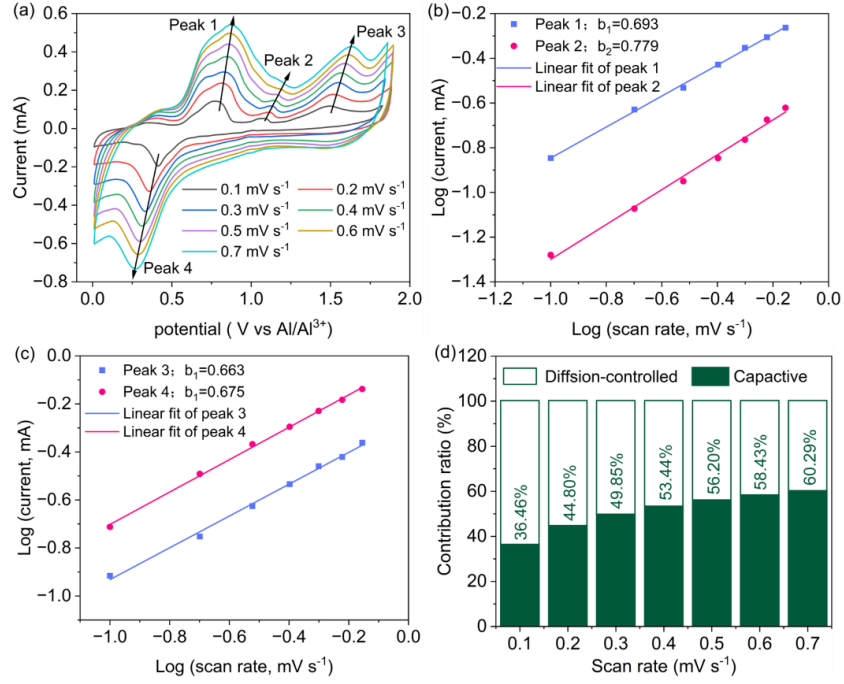

**Fig. S10** (a) CV curves of  $\text{Cu}_{1.95}\text{S}$  cathode from  $0.1$  to  $0.7 \text{ mV s}^{-1}$ . (b, c)  $\text{Log}(v)$  to  $\text{log}(i)$  linear analysis. (d) Ratios of capacitance and diffusion contribution.

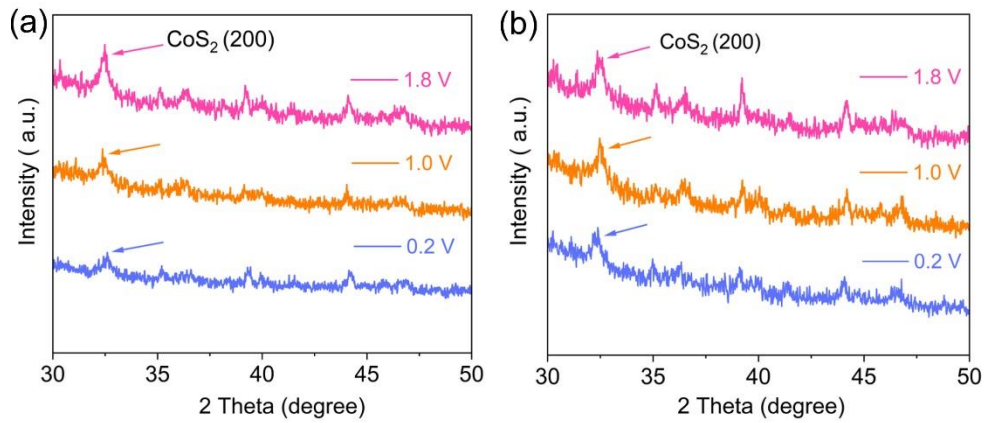

**Fig. S11** *Ex situ* XRD patterns of  $\text{Cu}_{1.95}\text{S}@/\text{CoS}_2$  in (a) discharge and (b) charge.

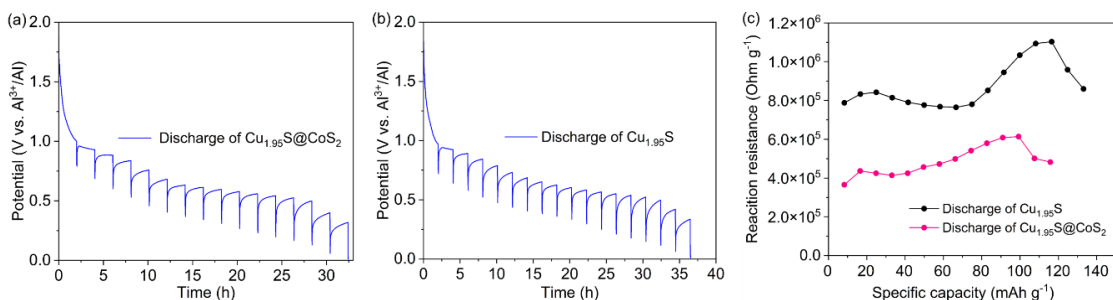

**Fig. S12** GITT time-potential curves of (a)  $\text{Cu}_{1.95}\text{S}@ \text{CoS}_2$  and (b)  $\text{Cu}_{1.95}\text{S}$  cathode during discharge. (c) *In-situ* interface reaction resistance of  $\text{Cu}_{1.95}\text{S}@ \text{CoS}_2$  and  $\text{Cu}_{1.95}\text{S}$  cathode.

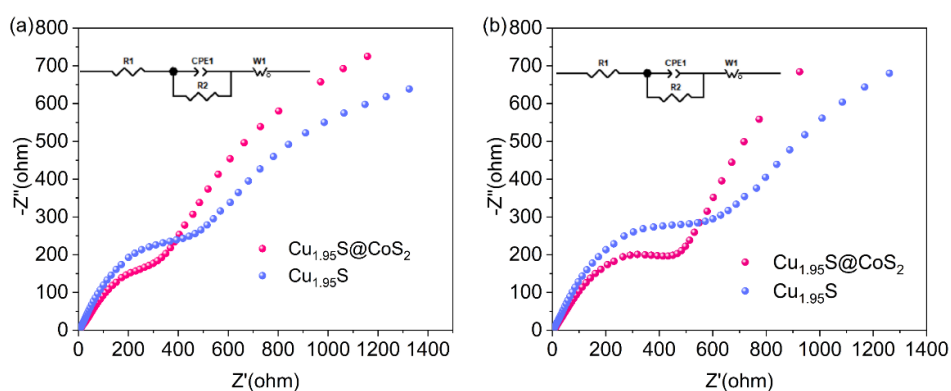

**Fig. S13** EIS spectra of  $\text{Cu}_{1.95}\text{S}@ \text{CoS}_2$  and  $\text{Cu}_{1.95}\text{S}$  (a) before and (b) after 100 cycles at  $0.5 \text{ A g}^{-1}$ .

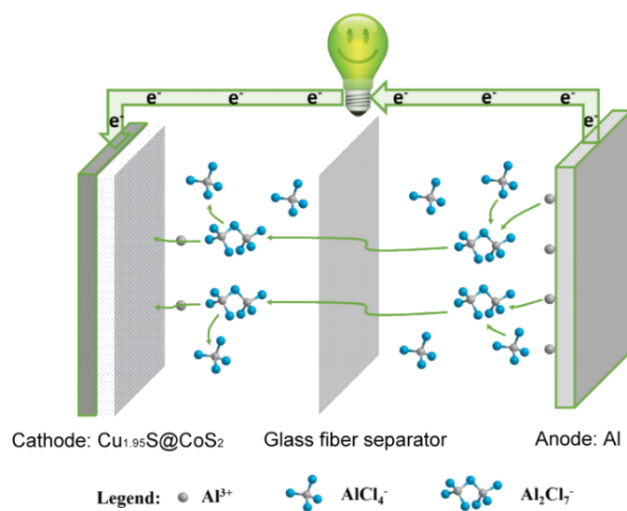

**Fig. S14** Schematic diagram of reaction principle in the discharge process of Al-ion battery.



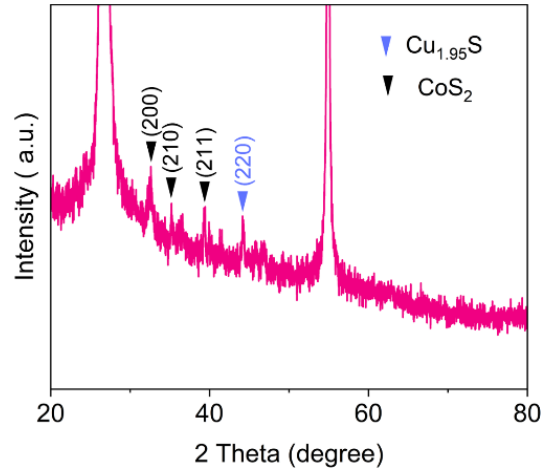

**Fig. S15** XRD patterns of  $\text{Cu}_{1.95}\text{S}@ \text{CoS}_2$  after 100 cycles at  $0.5 \text{ A g}^{-1}$ .

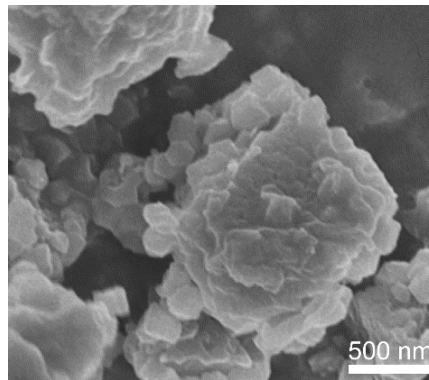

**Fig. S16** SEM image of  $\text{Cu}_{1.95}\text{S}@ \text{CoS}_2$  after 100 cycles at  $0.5 \text{ A g}^{-1}$ .

**Table S1.** Comparison of Al-ion battery performance among many cathode materials.

| Materials                                             | Current density<br>(A g <sup>-1</sup> ) | Cycle number | Capacity<br>(mAh g <sup>-1</sup> ) | Ref.         |
|-------------------------------------------------------|-----------------------------------------|--------------|------------------------------------|--------------|
| Cu <sub>2-x</sub> Se nanorods                         | 0.2                                     | 100          | 100                                | 1            |
| VO <sub>2</sub> nanorods                              | 0.05                                    | 100          | 116                                | 2            |
|                                                       | 0.1                                     | 100          | 106                                |              |
| Co <sub>3</sub> O <sub>4</sub> polyhedrons            | 0.1                                     | 100          | 31                                 | 3            |
| Co <sub>3</sub> O <sub>4</sub> @MWCNTs<br>polyhedrons | 0.1                                     | 150          | 125                                | 3            |
| CoS <sub>2</sub> @CNTs                                | 0.1                                     | 100          | 60                                 | 4            |
| MoS <sub>2</sub> microspheres                         | 0.05                                    | 100          | 112.2                              | 5            |
|                                                       | 0.1                                     | 150          | 58.5                               |              |
| MoO <sub>2</sub> @Ni                                  | 0.1                                     | 100          | 25                                 | 6            |
| TiO <sub>2</sub> nanorods                             | 0.5                                     | 150          | 91                                 | 7            |
| CuS@C<br>microspheres                                 | 0.02                                    | 100          | 90                                 | 8            |
| Cu <sub>1.81</sub> Te nanorods                        | 0.04                                    | 66           | 50                                 | 9            |
| ZnSe@SnSe <sub>2</sub><br>microcubes                  | 0.2                                     | 100          | 100                                | 10           |
| Cu <sub>1.95</sub> S@CoS <sub>2</sub>                 | 0.5                                     | 200          | 136.6                              | This<br>work |
|                                                       | 1                                       | 500          | 96.9                               |              |

## References

- [1] J. Jiang, H. Li, T. Fu, B. Hwang, X. Li and J. Zhao, *ACS Appl. Mater. Interfaces*, 2018, **10**, 17942–17949.
- [2] W. Wang, B. Jiang, W. Xiong, H. Sun, Z. Lin, L. Hu, J. Tu, J. Hou, H. Zhu and S. Jiao, *Sci. Rep.*, 2013, **3**, 3383.
- [3] X. Xiao, M. Wang, J. Tu, Y. Luo and S. Jiao, *ACS Sustainable Chem. Eng.*, 2019, **7**, 16200–16208.
- [4] K. Zhang, T. Lee, J. Cha, H. Jang, M. Shokouhimehr and J. Choi, *Electron. Mater. Lett.*, 2019, **15**, 727–732.
- [5] J. Tu, X. Xiao, M. Wang and S. Jiao, *J. Phys. Chem. C*, 2019, **123**, 26794–26802.
- [6] J. Wei, W. Chen, D. Chen and K. Yang, *J. Electrochem. Soc.*, 2017, **164**, A2304–A2309.
- [7] S. Wang, K. V. Kravchyk, S. Pigeot-Remy, W. Tang, F. Krumeich, M. Wörle, M. I. Bodnarchuk, S. Cassaignon, O. Durupthy, S. Zhao, C. Sanchez and M. V. Kovalenko, *ACS Appl. Nano Mater.*, 2019, **2**, 6428–6435.
- [8] S. Wang, S. Jiao, J. Wang, H. Chen, D. Tian, H. Lei and D. Fang, *ACS Nano*, 2017, **11**, 469–477.
- [9] J. Wu, D. Wu, M. Zhao, Z. Wen, J. Jiang, J. Zeng and J. Zhao, *Dalton Trans.*, 2020, **49**, 729–736.
- [10] J. Li, W. Luo, Z. Zhang, F. Li, Z. Chao, J. Fan, *J. Colloid Interf. Sci.*, 2023, **639**, 124–132.
